# Supplementary material for: Cumulative nitrogen enrichment alters the drivers of grassland overyielding
Source: PubMed Central journal article supplement (PMC10928195; doi:10.1038/s42003-024-05999-9), 2024-03-11
Supplement: 42003_2024_5999_MOESM1_ESM.pdf [file 42003_2024_5999_MOESM1_ESM.pdf]

## Supporting Information

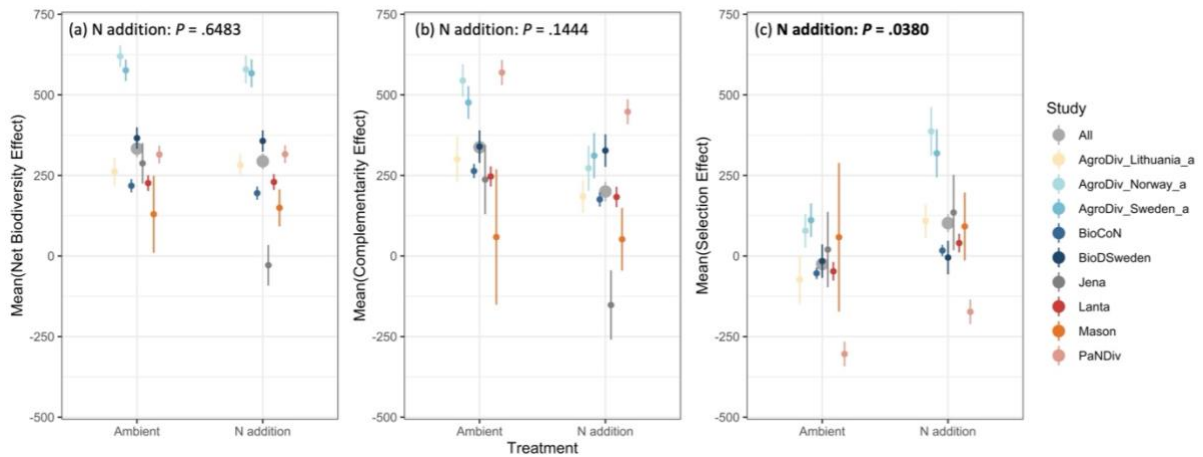

**Figure S1. N addition treatment** The impact of experimental N addition on the net biodiversity effects (a), the complementarity effects (b) and the selection effects (c) across (grey points) or on each individual study (colored points). The y-axes are on the original scale with unit  $g/m^2/year$ .

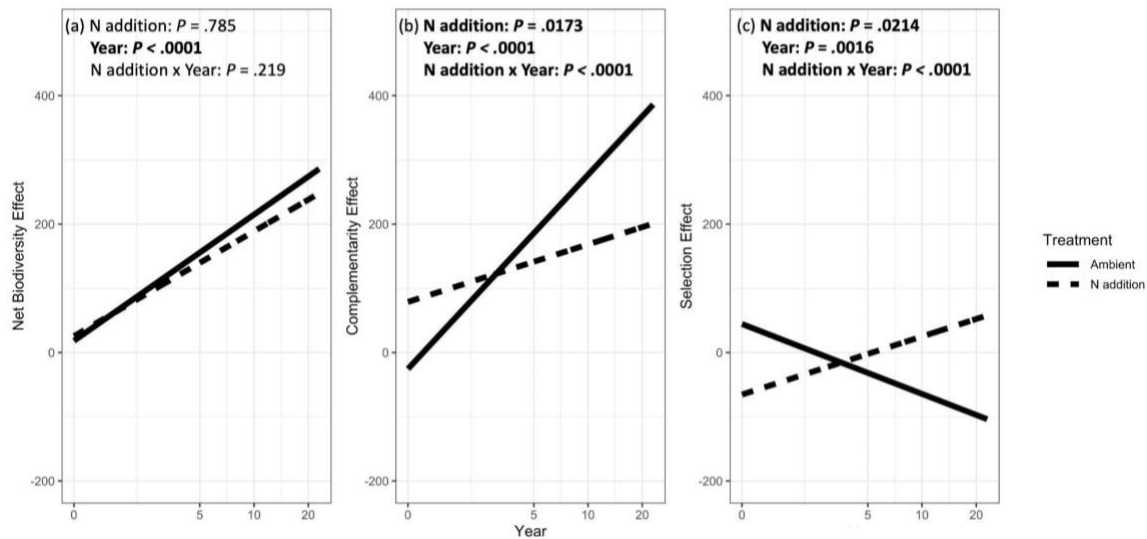

**Figure S2. Year x N addition treatment** The impact of N addition and its duration (year) on net biodiversity effects (a), complementarity effects (b) and selection effects (c) for BioCoN experiments (23 years). The BioCoN experiment was used to represent the temporal trend (Fig. 1) because it is the only experiment in our study that has more than 5 years of data. The x-axes are on the log scale with unit year, the y-axes are on the original scale with unit  $g/m^2/year$ .

**Table S1. Overview of dataset**

| Experiment | Region     | Study                         | Data repositories or owners' contact    | Treatment                                                                                                                                                                       | Fertilizer type | Nitrogen added amount (kg.ha-1.y-1)                           | Nitrogen atmospheric deposition (kg.ha-1.y-1) | Period  | Number of species | Used in    |                  |
|------------|------------|-------------------------------|-----------------------------------------|---------------------------------------------------------------------------------------------------------------------------------------------------------------------------------|-----------------|---------------------------------------------------------------|-----------------------------------------------|---------|-------------------|------------|------------------|
| 1          | BioCoN     | Cedar Creek, Minnesota, USA   | Isbell et al., 2013; Reich et al., 2001 | <a href="https://portal.edirepository.org/nis/mapbrowse?packageid=knb-lter-cdr.302.newest">https://portal.edirepository.org/nis/mapbrowse?packageid=knb-lter-cdr.302.newest</a> | AmbientN,N      | NH4NO3                                                        | 0,40                                          | 0.8412  | 1998-2020         | 1,4,9,16   | Fig. 2-4, S1, S2 |
| 2          | BioDSweden | Umea, Sweden                  | Palmborg, unpublished                   | Cecilia Palmborg (cecilia.palmborg@slu.se)                                                                                                                                      | AmbientN,N      | NH4NO3                                                        | 0,50                                          | 12.8280 | 2002-2003         | 1,2,4,8,12 | Fig. 2-4, S2     |
| 3          | Lanta      | Benesov/Lipou, Czech Republic | Lanta & Leps 2007                       | Vojtech Lanta (vlanta@centrum.cz); Jan Lepš (suspa@prf.jcu.cz)                                                                                                                  | AmbientNPK, NPK | Liquid fertilizer (Synferta P-NPK, AGRO CS Ceska Škalice, CZ) | 0, 48N (400 kg/ha NPK with 12%N+12%P +12%K)   | 2.3688  | 2002-2006         | 1,2,4,8,16 | Fig. 2-4, S2     |
| 4          | Mason      | the North Island, New Zealand | Mason et al., 2020                      | Norman Mason (masonn@landcareresearch.co.nz)                                                                                                                                    | AmbientN,N      | Urea                                                          | 0,50,100,200, 350,500                         | 7.0888  | 2015.06 - 2016.05 | 1,5        | Fig. 3-4, S2     |

|    |                  |                                    |                             |                                                                                                                             |                    |         |                                   |         |               |          |                 |
|----|------------------|------------------------------------|-----------------------------|-----------------------------------------------------------------------------------------------------------------------------|--------------------|---------|-----------------------------------|---------|---------------|----------|-----------------|
| 5  | PaNDiv           | Münchenbuc<br>hsee,<br>Switzerland | Pichon et<br>al., 2020      | Eric Allan (eric.allan@unibe.ch);<br>Seraina Cappelli<br>(scappell@umn.edu); Noémie<br>Pichon (noemie.pichon@wsl.ch)        | AmbientN,N         | Urea    | 0,100                             | 1.9312  | 2017-<br>2020 | 1,4,8,20 | Fig. 2-4,<br>S2 |
| 6  | Pontes           | Theix, France                      | Pontes et<br>al., 2012      | Laise da Silveira Pontes<br>(laisepontes@hotmail.com)                                                                       | N                  | NH4NO3  | 120,360                           | 1.5924  | 2003-<br>2004 | 1,6      | Fig. 3-4        |
| 7  | Jena_Ros<br>cher | Jena, German<br>y                  | Roscher<br>et al.,<br>2016  | Christiane Roscher<br>(christiane.roscher@ufz.de)                                                                           | AmbientNPK,<br>NPK | N, P, K | 0,150(N)+65.<br>4(P)+124.5(K<br>) | 2.2940  | 2009          | 1,2,3,4  | Fig. 2-4,<br>S2 |
| 8  |                  | France                             |                             |                                                                                                                             | N                  | NH4NO3  | 40,120                            | 1.4128  | 2004-<br>2006 | 1,4      | Fig. 3-4        |
| 9  |                  | Ireland_b                          |                             |                                                                                                                             | N                  | NH4NO3  | 75,150                            | 2.7513  | 2006-<br>2007 | 1,4      | Fig. 3-4        |
| 10 |                  | Ireland_c                          |                             |                                                                                                                             | N                  | NH4NO3  | 100,200                           | 2.8227  | 2006-<br>2007 | 1,4      | Fig. 3-4        |
| 11 | AgroDiv          | Ireland_e                          | Kirwan,<br>2014<br>Metadata | <a href="https://www.esapubs.org/archive/e&lt;br/&gt;col/E095/232/">https://www.esapubs.org/archive/e<br/>col/E095/232/</a> | N                  | NH4NO3  | 50,200                            | 2.6253  | 2007-<br>2009 | 1,2,4    | Fig. 3-4        |
| 12 |                  | Lithuania_a                        |                             |                                                                                                                             | AmbientN,N         | NH4NO3  | 0,120                             | 14.1593 | 2003-<br>2005 | 1,4      | Fig. 3-4,<br>S2 |
| 13 |                  | Norway                             |                             |                                                                                                                             | AmbientN,N         | NH4NO3  | 0,240                             | 2.6045  | 2004-<br>2006 | 1,4      | Fig. 3-4,<br>S2 |
| 14 |                  | Sweden_a                           |                             |                                                                                                                             | AmbientN,N         | NH4NO3  | 0,180                             | 3.6901  | 2003-<br>2005 | 1,4      | Fig. 3-4,<br>S2 |

|    |             |   |                                 |            |        |           |     |          |
|----|-------------|---|---------------------------------|------------|--------|-----------|-----|----------|
| 15 | Switzerland | N | NH <sub>4</sub> NO <sub>3</sub> | 50,150,450 | 1.7409 | 2003-2005 | 1,4 | Fig. 3-4 |
|----|-------------|---|---------------------------------|------------|--------|-----------|-----|----------|

---

\*Ireland\_b, Ireland\_c and Ireland\_e represents three different experimental sites in Ireland.

**Table S2.** Hypotheses and mechanisms on overyielding and how it changes through time, nitrogen addition, and cumulative nitrogen addition.

| Relationship                                              | Slope               | Hypotheses and mechanisms                                                                                                                                                                                                                                                                                   | Reference                                    |
|-----------------------------------------------------------|---------------------|-------------------------------------------------------------------------------------------------------------------------------------------------------------------------------------------------------------------------------------------------------------------------------------------------------------|----------------------------------------------|
| Overyielding                                              |                     |                                                                                                                                                                                                                                                                                                             |                                              |
| Species richness -> Complementarity effects               | Positive            | Communities with more species have higher potential to partition resource niche or facilitate each other, thus leading to a higher complementarity effect                                                                                                                                                   | Kahman et al., (2006); Wright et al., (2017) |
| Species richness -> Selection effects                     | Negative or neutral | The promotion of the species in mixture that performed poorly in monoculture leads to a decrease of selection effects with higher number of species                                                                                                                                                         | Jiang et al., (2008)                         |
| Species richness -> Net biodiversity effects              | Positive            | The positive relationship between biodiversity and complementarity effects contributes more than the negative relationship between biodiversity and selection effects, leading to a positive relationship between biodiversity and the net biodiversity effects                                             | Craven et al., (2016)                        |
| H1a: Overyielding change under nitrogen (N) addition      |                     |                                                                                                                                                                                                                                                                                                             |                                              |
| N addition -> Complementarity effects                     | Negative            | N addition reduces complementarity effects by reducing niche complementarity or facilitation, leading to a weaker relationship between richness and complementarity effects compared to ambient conditions, and the response is larger with higher species richness.                                        | Craven et al., (2016)                        |
| N addition -> Selection effects                           | Positive            | N addition increases selection effects by increasing the dominance of nitrophilous species and their competition with other species, leading to a more positive relationship between richness and selection effects compared to ambient conditions, and the response is larger with higher species richness | Kirwan et al., (2007)                        |
| N addition -> Net biodiversity effects                    | TBD                 | A decrease in complementarity effects that is proportional with the increase of selection effects leads to a robust NA relationship between the net biodiversity effects and diversity under N addition                                                                                                     |                                              |
| H1b: Overyielding change under increasing N addition rate |                     |                                                                                                                                                                                                                                                                                                             |                                              |
| N addition rate -> Complementarity effects                | Negative            | The increase of N addition rate could bring larger decrease to complementarity effects due to larger variation in plant species composition and soil biota under higher annual N addition rate                                                                                                              | Song et al., (2011); You et al., (2017)      |

|                                      |          |                                                                                                                                                                                                                                                                                                                             |                                             |
|--------------------------------------|----------|-----------------------------------------------------------------------------------------------------------------------------------------------------------------------------------------------------------------------------------------------------------------------------------------------------------------------------|---------------------------------------------|
| N addition rate -> Selection effects | Positive | The increase of N addition rate could increase selection effects by enhancing the dominance of certain species. Low annual N addition rate might promote fast-growing exploitative species; while slow-growing conservative species that produce more leaf dry matter tend to prevail under higher N addition rate instead. | Wardle et al., (2004); Orwin et al., (2021) |
|--------------------------------------|----------|-----------------------------------------------------------------------------------------------------------------------------------------------------------------------------------------------------------------------------------------------------------------------------------------------------------------------------|---------------------------------------------|

|                                             |     |                                                                                                                                                                                                                       |    |
|---------------------------------------------|-----|-----------------------------------------------------------------------------------------------------------------------------------------------------------------------------------------------------------------------|----|
| N addition rate -> Net biodiversity effects | TBD | With increasing N addition rate, a larger decrease in complementarity effects compared to the increase of selection effects leads to a negative relationship between the net biodiversity effects and N addition rate | NA |
|---------------------------------------------|-----|-----------------------------------------------------------------------------------------------------------------------------------------------------------------------------------------------------------------------|----|

H2: Overyielding change through time, which is opposite to the effects of N addition

|                                 |          |                                                                                                                                                                                   |                                             |
|---------------------------------|----------|-----------------------------------------------------------------------------------------------------------------------------------------------------------------------------------|---------------------------------------------|
| Year -> Complementarity effects | Positive | Complementarity effects increases with time due to belowground facilitation and faster cumulative N addition strengthening as experiment ages, especially under mixture community | Kahmen et al., (2006); Mason et al., (2020) |
|---------------------------------|----------|-----------------------------------------------------------------------------------------------------------------------------------------------------------------------------------|---------------------------------------------|

|                           |          |                                                                                                                                                                                                                               |                 |
|---------------------------|----------|-------------------------------------------------------------------------------------------------------------------------------------------------------------------------------------------------------------------------------|-----------------|
| Year -> Selection effects | Negative | Selection effects decreases with time, or even reverse from positive in the early stage to negative in the later stage due to that a few established species growing well only in early stage and grow less competitive later | Fargione (2007) |
|---------------------------|----------|-------------------------------------------------------------------------------------------------------------------------------------------------------------------------------------------------------------------------------|-----------------|

|                                  |          |                                                                                                                                 |                                                                       |
|----------------------------------|----------|---------------------------------------------------------------------------------------------------------------------------------|-----------------------------------------------------------------------|
| Year -> Net biodiversity effects | Positive | The net biodiversity effects increase with time due to the contribution shift from selection effects to complementarity effects | Fargione et al., (2007); Marquard et al., (2009); Wagg et al., (2022) |
|----------------------------------|----------|---------------------------------------------------------------------------------------------------------------------------------|-----------------------------------------------------------------------|

H3: Overyielding change with increasing cumulative N addition

|                                                  |                                |                                                                                                                                                                                                          |    |
|--------------------------------------------------|--------------------------------|----------------------------------------------------------------------------------------------------------------------------------------------------------------------------------------------------------|----|
| Cumulative N addition -> Complementarity effects | Shift from negative to neutral | Complementarity effects decrease faster at low levels of cumulative N addition due to a potentially greater loss of positive interactions among species compared to high levels of cumulative N addition | NA |
|--------------------------------------------------|--------------------------------|----------------------------------------------------------------------------------------------------------------------------------------------------------------------------------------------------------|----|

|                                            |          |                                                                                                                                                         |    |
|--------------------------------------------|----------|---------------------------------------------------------------------------------------------------------------------------------------------------------|----|
| Cumulative N addition -> Selection effects | Positive | Selection effects stay positive at low levels of cumulative N addition and then increase faster with higher levels of cumulative N addition in the plot | NA |
|--------------------------------------------|----------|---------------------------------------------------------------------------------------------------------------------------------------------------------|----|

Cumulative N addition -> TBD  
Net biodiversity effects

With increasing cumulative N addition, complementarity effects decrease faster at low levels of cumulative N addition and selection effects increases faster at higher levels of cumulative N addition, leading to a convex relationship between the net biodiversity effects and cumulative N addition.

---

**Table S3.** Model settings and the result in summary table. Response variables include net biodiversity effect (NBE), complementarity effect (CE) and selection effect (SE). Explanatory variables include treatment (nitrogen addition, N), species richness (SR), N addition rate (N rate), cumulative N addition (CumUN). Asterisks (\*) indicate statistical significance (ns,  $P>0.05$ ; \*  $P<0.05$ ; \*\*  $P<0.01$ ; \*\*\* $P<0.001$ ).

| Figure                                                            | Model | Response Variables | Terms         | Estimate | Std.Error | df       | t-value | p-value  | Sig | R2m  | R2c  |
|-------------------------------------------------------------------|-------|--------------------|---------------|----------|-----------|----------|---------|----------|-----|------|------|
| 2 ~Treatment * SR + (1 + SR   Study)                              |       |                    |               |          |           |          |         |          |     |      |      |
| 2a                                                                |       | NBE                | (Intercept)   | -57.777  | 70.7550   | 3.845    | -0.8170 | 0.4617   | ns  | 0.12 | 0.41 |
|                                                                   |       | NBE                | N addition    | 16.173   | 28.1160   | 2384.488 | 0.575   | 0.5652   | ns  | 0.12 | 0.41 |
|                                                                   |       | NBE                | SR            | 105.286  | 37.8480   | 3.821    | 2.7820  | 0.0524   | .   | 0.12 | 0.41 |
|                                                                   |       | NBE                | N addition:SR | -11.196  | 9.1580    | 2384.478 | -1.222  | 0.2217   | ns  | 0.12 | 0.41 |
| 2b                                                                |       | CE                 | (Intercept)   | -83.798  | 37.0110   | 1023.645 | -2.2640 | 0.0238   | *   | 0.07 | 0.20 |
|                                                                   |       | CE                 | N addition    | 72.904   | 50.9470   | 2388.231 | 1.431   | 0.15257  | ns  | 0.07 | 0.20 |
|                                                                   |       | CE                 | SR            | 136.166  | 26.6670   | 3.229    | 5.1060  | 0.01211  | *   | 0.07 | 0.20 |
|                                                                   |       | CE                 | N addition:SR | -54.169  | 16.5960   | 2388.226 | -3.264  | 0.00111  | **  | 0.07 | 0.20 |
| 2c                                                                |       | SE                 | (Intercept)   | 15.173   | 106.0280  | 4.189    | 0.1430  | 0.8928   | ns  | 0.01 | 0.18 |
|                                                                   |       | SE                 | N addition    | -36.943  | 56.4410   | 2387.518 | -0.655  | 0.5128   | ns  | 0.01 | 0.18 |
|                                                                   |       | SE                 | SR            | -33.838  | 60.5700   | 4.026    | -0.5590 | 0.606    | ns  | 0.01 | 0.18 |
|                                                                   |       | SE                 | N addition:SR | 39.41    | 18.3850   | 2387.396 | 2.144   | 0.0322   | *   | 0.01 | 0.18 |
| 3 ~ log(N rate+1) + (1 + log(N rate+1)   Study) - Include ambient |       |                    |               |          |           |          |         |          |     |      |      |
| 3a                                                                |       | NBE                | Intercept     | 293.777  | 48.3530   | 11.8540  | 6.0760  | 0.0001   | *** | 0.00 | 0.40 |
|                                                                   |       | NBE                | log(N rate+1) | -6.689   | 2.7250    | 44.325   | -2.455  | 0.0181   | *   | 0.00 | 0.40 |
| 3b                                                                |       | CE                 | Intercept     | 364.132  | 62.6080   | 7.9480   | 5.8160  | 0.0004   | *** | 0.02 | 0.19 |
|                                                                   |       | CE                 | log(N rate+1) | -30.491  | 13.2770   | 7.603    | -2.296  | 0.052398 | .   | 0.02 | 0.19 |
| 3c                                                                |       | SE                 | Intercept     | -38.412  | 76.2880   | 5.9510   | -0.5040 | 0.6330   | ns  | 0.00 | 0.13 |
|                                                                   |       | SE                 | log(N rate+1) | 19.33    | 20.9230   | 6.18     | 0.924   | 0.39     | ns  | 0.00 | 0.13 |
| ~ log(N rate+1) + (1 + log(N rate+1)   Study) - Exclude ambient   |       |                    |               |          |           |          |         |          |     |      |      |
| 3d                                                                |       | NBE                | Intercept     | 434.283  | 136.8190  | 7.1620   | 3.1740  | 0.0152   | *   | 0.01 | 0.46 |
|                                                                   |       | NBE                | log(N rate+1) | -37.525  | 24.9290   | 5.475    | -1.505  | 0.1876   | ns  | 0.01 | 0.46 |
| 3e                                                                |       | CE                 | Intercept     | 369.196  | 180.6780  | 9.3410   | 2.0430  | 0.0702   | .   | 0.00 | 0.26 |
|                                                                   |       | CE                 | log(N rate+1) | -32.37   | 39.0900   | 8.635    | -0.828  | 0.4299   | ns  | 0.00 | 0.26 |
| 3f                                                                |       | SE                 | Intercept     | -33.7    | 205.0600  | 83.5400  | -0.1640 | 0.8700   | ns  | 0.00 | 0.12 |
|                                                                   |       | SE                 | log(N rate+1) | 15.32    | 53.7400   | 85.66    | 0.285   | 0.776    | ns  | 0.00 | 0.12 |



|                                                                                                                |                                         |                   |         |          |          |         |          |     |      |      |
|----------------------------------------------------------------------------------------------------------------|-----------------------------------------|-------------------|---------|----------|----------|---------|----------|-----|------|------|
| 4 ~ log(CumuN+1) + I(log(CumuN+1)^2)+(1 + log(CumuN+1)   Study) [experimental addition]                        |                                         |                   |         |          |          |         |          |     |      |      |
| 4a                                                                                                             | NBE                                     | Intercept         | 389.05  | 73.0930  | 11.3130  | 5.3230  | 0.0002   | *** | 0.05 | 0.53 |
|                                                                                                                | NBE                                     | log(CumuN+1)      | -89.936 | 14.147   | 26.99    | -6.357  | 8.31E-07 | *** | 0.05 | 0.53 |
|                                                                                                                | NBE                                     | I(log(CumuN+1)^2) | 12.027  | 1.524    | 597.053  | 7.89    | 1.45E-14 | *** | 0.05 | 0.53 |
| 4b                                                                                                             | CE                                      | Intercept         | 332.905 | 56.4900  | 10.4960  | 5.8930  | 0.0001   | *** | 0.01 | 0.21 |
|                                                                                                                | CE                                      | log(CumuN+1)      | -43.23  | 12.601   | 599.566  | -3.431  | 0.000644 | *** | 0.01 | 0.21 |
|                                                                                                                | CE                                      | I(log(CumuN+1)^2) | 4.279   | 2.028    | 3334.599 | 2.109   | 0.034989 | *   | 0.01 | 0.21 |
| 4c                                                                                                             | SE                                      | Intercept         | -18.02  | 49.7850  | 3.5490   | -0.3620 | 0.738    | ns  | 0.01 | 0.13 |
|                                                                                                                | SE                                      | log(CumuN+1)      | -8.454  | 21.78    | 11.316   | -0.388  | 0.705    | ns  | 0.01 | 0.13 |
|                                                                                                                | SE                                      | I(log(CumuN+1)^2) | 4.238   | 2.93     | 113.153  | 1.447   | 0.151    | ns  | 0.01 | 0.13 |
| ~ log(CumuN+1) + I(log(CumuN+1)^2)+(1 + log(CumuN+1)   Study) [atmospheric deposition]                         |                                         |                   |         |          |          |         |          |     |      |      |
| 4d                                                                                                             | NBE                                     | Intercept         | 318.97  | 74.7800  | 17.62    | 4.2660  | 0.0005   | *** | 0.04 | 0.54 |
|                                                                                                                | NBE                                     | log(CumuN+1)      | -127.03 | 53.86    | 42.77    | -2.358  | 0.022998 | *   | 0.04 | 0.54 |
|                                                                                                                | NBE                                     | I(log(CumuN+1)^2) | 52.32   | 1.04E+01 | 704.29   | 5.033   | 6.15E-07 | *** | 0.04 | 0.54 |
| 4e                                                                                                             | CE                                      | Intercept         | 390.97  | 133.8800 | 21.1700  | 2.9200  | 0.0081   | **  | 0.00 | 0.24 |
|                                                                                                                | CE                                      | log(CumuN+1)      | -113.24 | 89.03    | 67.56    | -1.272  | 0.20774  | ns  | 0.00 | 0.24 |
|                                                                                                                | CE                                      | I(log(CumuN+1)^2) | 21.53   | 18.45    | 837.25   | 1.167   | 0.2436   | ns  | 0.00 | 0.24 |
| 4f                                                                                                             | SE                                      | Intercept         | -109.84 | 130.4100 | 27.7800  | -0.8420 | 0.407    | ns  | 0.03 | 0.20 |
|                                                                                                                | SE                                      | log(CumuN+1)      | 13.01   | 98.89    | 105.01   | 0.132   | 0.896    | ns  | 0.03 | 0.20 |
|                                                                                                                | SE                                      | I(log(CumuN+1)^2) | 30.84   | 22.1     | 576.32   | 1.396   | 0.163    | ns  | 0.03 | 0.20 |
| ~ log(CumuN+1) + I(log(CumuN+1)^2)+(1 + log(CumuN+1)   Study) [experimental addition + atmospheric deposition] |                                         |                   |         |          |          |         |          |     |      |      |
| 4g                                                                                                             | NBE                                     | Intercept         | 249.016 | 52.6420  | 17.1850  | 4.7300  | 0.0002   | *** | 0.00 | 0.41 |
|                                                                                                                | NBE                                     | log(CumuN+1)      | 15.96   | 14.584   | 52.63    | 1.094   | 0.278809 | ns  | 0.00 | 0.41 |
|                                                                                                                | NBE                                     | I(log(CumuN+1)^2) | -2.403  | 1.652    | 365.216  | -1.454  | 0.146673 | ns  | 0.00 | 0.41 |
| 4h                                                                                                             | CE                                      | Intercept         | 262.165 | 72.7680  | 19.5020  | 3.6030  | 0.0018   | **  | 0.02 | 0.19 |
|                                                                                                                | CE                                      | log(CumuN+1)      | 36.406  | 26.876   | 78.522   | 1.355   | 0.17943  | ns  | 0.02 | 0.19 |
|                                                                                                                | CE                                      | I(log(CumuN+1)^2) | -8.206  | 2.92     | 783.896  | -2.81   | 0.00508  | **  | 0.02 | 0.19 |
| 4i                                                                                                             | SE                                      | Intercept         | -16.677 | 93.0740  | 12.5480  | -0.1790 | 0.8607   | ns  | 0.01 | 0.14 |
|                                                                                                                | SE                                      | log(CumuN+1)      | -19.77  | 35.232   | 52.672   | -0.561  | 0.5771   | ns  | 0.01 | 0.14 |
|                                                                                                                | SE                                      | I(log(CumuN+1)^2) | 6.358   | 3.613    | 880.283  | 1.76    | 0.0788   | .   | 0.01 | 0.14 |
| S1                                                                                                             | Treatment*log(Year) + (1   SR) - BioCoN |                   |         |          |          |         |          |     |      |      |
| S1a                                                                                                            | NBE                                     | (Intercept)       | 18.255  | 34.8160  | 3.748    | 0.5240  | 0.6300   | ns  | 0.11 | 0.17 |

|     |                                                                                    |                      |           |         |           |         |          |     |      |      |
|-----|------------------------------------------------------------------------------------|----------------------|-----------|---------|-----------|---------|----------|-----|------|------|
| S1b | NBE                                                                                | N addition           | 7.219     | 26.475  | 1404.017  | 0.273   | 0.785    | ns  | 0.11 | 0.17 |
|     | NBE                                                                                | log(Year)            | 85.3740   | 8.639   | 1396.8340 | 9.882   | <2e-16   | *** | 0.11 | 0.17 |
|     | NBE                                                                                | N addition:log(Year) | -14.406   | 11.718  | 1404.0170 | -1.229  | 0.219    | ns  | 0.11 | 0.17 |
|     | CE                                                                                 | (Intercept)          | 25.51     | 38.5700 | 12.65     | -0.6610 | 0.5202   | ns  | 0.08 | 0.10 |
|     | CE                                                                                 | N addition           | 104.34    | 43.78   | 1404.12   | 2.383   | 0.0173   | *   | 0.08 | 0.10 |
|     | CE                                                                                 | log(Year)            | 131.3200  | 14.19   | 1220.6200 | 9.253   | <2e-16   | *** | 0.08 | 0.10 |
| S1c | CE                                                                                 | N addition:log(Year) | -92.43    | 19.38   | 1.40E+03  | -4.77   | 2.03E-06 | *** | 0.08 | 0.10 |
|     | SE                                                                                 | (Intercept)          | 44.43     | 33.7300 | 1406      | 1.3170  | 0.1880   | ns  | 0.02 | 0.02 |
|     | SE                                                                                 | N addition           | -109.91   | 47.71   | 1406      | -2.304  | 0.02138  | *   | 0.02 | 0.02 |
|     | SE                                                                                 | log(Year)            | -47.2700  | 14.93   | 1406.0000 | -3.166  | 0.00158  | **  | 0.02 | 0.02 |
|     | SE                                                                                 | N addition:log(Year) | 86.56     | 21.12   | 1.41E+03  | 4.099   | 4.38E-05 | *** | 0.02 | 0.02 |
| S2  | ~ Treatment*Study, random= ~ 1 Year/Plot, correlation=corAR1(form = ~ 1 Year/Plot) |                      |           |         |           |         |          |     |      |      |
| S2a | NBE                                                                                | Intercept            | 261.8099  | 43.0091 | 2662      | 6.0873  | 0.0000   | *** | 0.18 | 0.91 |
|     | NBE                                                                                | N addition           | 20.4067   | 44.7277 | 2662      | 0.4562  | 0.6483   | ns  | 0.18 | 0.91 |
| S2b | CE                                                                                 | Intercept            | 300.3024  | 70.0631 | 2662      | 4.2862  | 0.0000   | *** | 0.09 | 0.89 |
|     | CE                                                                                 | N addition           | -115.7748 | 79.2881 | 2662      | -1.4602 | 0.1444   | ns  | 0.09 | 0.89 |
| S2c | SE                                                                                 | Intercept            | -73.4749  | 74.7954 | 2662      | -0.9823 | 0.3260   | ns  | 0.06 | 0.89 |
|     | SE                                                                                 | N addition           | 181.5754  | 87.4883 | 2662      | 2.0754  | 0.0380   | *   | 0.06 | 0.89 |

**Table S4.** Model selections for the effectiveness of cumulative N addition (Cumun). Response variables include net biodiversity effect (NBE), complementarity effect (CE) and selection effect (SE). Asterisks (\*) indicate statistical significance (ns,  $P>0.05$ ; \*  $P<0.05$ ; \*\*  $P<0.01$ ; \*\*\*  $P<0.001$ ).

| Response Variables | Model                                            | Number of parameters | AIC   | BIC   | Negative log-likelihood | Deviance | Chisq   | Df | Pr(>Chisq)   |
|--------------------|--------------------------------------------------|----------------------|-------|-------|-------------------------|----------|---------|----|--------------|
| NBE                | ~ log(N rate+1) * Year + (1   SR)                | 6                    | 49168 | 49205 | -24578                  | 49156    |         |    |              |
| NBE                | ~ log(N rate+1) * Year + log(CumuN+1) + (1   SR) | 7                    | 49096 | 49140 | -24541                  | 49082    | 73.9080 | 1  | 2.20E-16 *** |
| CE                 | ~ log(N rate+1) * Year + (1   SR)                | 6                    | 53063 | 53100 | -26526                  | 53051    |         |    |              |
| CE                 | ~ log(N rate+1) * Year + log(CumuN+1) + (1   SR) | 7                    | 53027 | 53071 | -26507                  | 53031    | 37.6870 | 1  | 8.31E-10 *** |
| SE                 | ~ log(N rate+1) * Year + (1   SR)                | 6                    | 54528 | 54565 | -27258                  | 54516    |         |    |              |
| SE                 | ~ log(N rate+1) * Year + log(CumuN+1) + (1   SR) | 7                    | 54529 | 54572 | -27257                  | 54515    | 1.1655  | 1  | 2.80E-01 ns  |

**Table S5.** Model selections for cumulative N addition in first and second order (Cumun). Response variables include net biodiversity effect (NBE), complementarity effect (CE) and selection effect (SE). Asterisks (\*) indicate statistical significance (ns,  $P>0.05$ ; \*  $P<0.05$ ; \*\*  $P<0.01$ ; \*\*\*  $P<0.001$ ).

| Response Variables | Model                                                                                                     | Number of parameters | AIC   | BIC   | Negative log-likelihood | Deviance | Chisq  | Df | Pr(>Chisq)   |
|--------------------|-----------------------------------------------------------------------------------------------------------|----------------------|-------|-------|-------------------------|----------|--------|----|--------------|
| NBE                | $\sim \log(\text{Cumun} + 1) + (1 + \log(\text{Cumun} + 1)   \text{Study})$                               | 6                    | 48925 | 48962 | -24456                  | 48913    |        |    |              |
| NBE                | $\sim \log(\text{Cumun} + 1) + I(\log(\text{Cumun} + 1)^2) + (1 + \log(\text{Cumun} + 1)   \text{Study})$ | 7                    | 48925 | 48968 | -24455                  | 48911    | 1.8454 | 1  | 0.1743<br>ns |
| CE                 | $\sim \log(\text{Cumun} + 1) + (1 + \log(\text{Cumun} + 1)   \text{Study})$                               | 6                    | 52180 | 52217 | -26084                  | 52168    |        |    |              |
| CE                 | $\sim \log(\text{Cumun} + 1) + I(\log(\text{Cumun} + 1)^2) + (1 + \log(\text{Cumun} + 1)   \text{Study})$ | 7                    | 52175 | 52219 | -26081                  | 52161    | 6.8441 | 1  | 0.0089 **    |
| SE                 | $\sim \log(\text{Cumun} + 1) + (1 + \log(\text{Cumun} + 1)   \text{Study})$                               | 6                    | 52563 | 52600 | -26276                  | 52551    |        |    |              |
| SE                 | $\sim \log(\text{Cumun} + 1) + I(\log(\text{Cumun} + 1)^2) + (1 + \log(\text{Cumun} + 1)   \text{Study})$ | 7                    | 52561 | 52605 | -26274                  | 52547    | 4.0177 | 1  | 0.0450 *     |

**Table S6.** Model settings and the result in summary table for the effects of evenness change with cumulative nitrogen addition and time. Response variables include net biodiversity effect (NBE), complementarity effect (CE) and selection effect (SE). Explanatory variables include treatment (N addition), species richness (SR), Year, cumulative N addition (Cumun). Asterisks (\*) indicate statistical significance (ns,  $P>0.05$ ; \*  $P<0.05$ ; \*\*  $P<0.01$ ; \*\*\* $P<0.001$ ).

| Model                                   | Response Variables                                                       | Terms                | Estimate | Std.Error | df       | t-value | p-value | Sig  | R2m  | R2c  |
|-----------------------------------------|--------------------------------------------------------------------------|----------------------|----------|-----------|----------|---------|---------|------|------|------|
| <i>Cumulative N addition</i>            | ~ evenness + log(CumuN+1) + I(log(CumuN+1)^2)+(1 + log(CumuN+1)   Study) |                      |          |           |          |         |         |      |      |      |
|                                         | NBE                                                                      | (Intercept)          | 449.73   | 60.5      | 15.03    | 7.43    | 0       | ***  | 0.05 | 0.47 |
|                                         | NBE                                                                      | evenness             | -324.4   | 9.54      | 24861.7  | -34.01  | <2e-16  | ***  | 0.05 | 0.47 |
|                                         | NBE                                                                      | log(CumuN+1)         | 5.74     | 9.14      | 24.9     | 0.63    | 0.536   | ns   | 0.05 | 0.47 |
|                                         | NBE                                                                      | I(log(CumuN+1)^2)    | -2.27    | 0.59      | 17541.44 | -3.82   | 0.0001  | ***  | 0.05 | 0.47 |
|                                         | CE                                                                       | Intercept            | 219.2    | 76.93     | 14.35    | 2.85    | 0.0126  | *    | 0.02 | 0.25 |
|                                         | CE                                                                       | evenness             | -18.86   | 16.38     | 24405.55 | -1.15   | 0.2496  | ns   | 0.02 | 0.25 |
|                                         | CE                                                                       | log(CumuN+1)         | 65.41    | 18.05     | 20.97    | 3.62    | 0.0016  | **   | 0.02 | 0.25 |
|                                         | CE                                                                       | I(log(CumuN+1)^2)    | -11.66   | 1.02      | 19215.6  | -11.41  | <2e-16  | ***  | 0.02 | 0.25 |
|                                         | SE                                                                       | Intercept            | 290.67   | 94.48     | 15.3     | 3.08    | 0.0075  | **   | 0.04 | 0.27 |
|                                         | SE                                                                       | evenness             | -439.55  | 17.7      | 24204.45 | -24.83  | <2e-16  | ***  | 0.04 | 0.27 |
|                                         | SE                                                                       | log(CumuN+1)         | -61.16   | 24.03     | 17.86    | -2.55   | 0.0204  | *    | 0.04 | 0.27 |
| SE                                      | I(log(CumuN+1)^2)                                                        | 10.19                | 1.11     | 21722.96  | 9.21     | <2e-16  | ***     | 0.04 | 0.27 |      |
| <i>Year effect on BioCoN experiment</i> | ~ evenness + Treatment*log(Year) + (1   SR) - BioCoN                     |                      |          |           |          |         |         |      |      |      |
|                                         | NBE                                                                      | (Intercept)          | 51.83    | 28.04     | 2.49     | 8.98    | 0.0059  | **   | 0.23 | 0.27 |
|                                         | NBE                                                                      | evenness             | -760.36  | 22.79     | 13953.30 | -33.37  | <2e-16  | ***  | 0.23 | 0.27 |
|                                         | NBE                                                                      | N addition           | -35.52   | 8.35      | 15348.70 | -4.25   | <2e-16  | ***  | 0.23 | 0.27 |
|                                         | NBE                                                                      | log(Year)            | 67.29    | 2.68      | 15348.91 | 25.09   | <2e-16  | ***  | 0.23 | 0.27 |
|                                         | NBE                                                                      | N addition:log(Year) | -3.70    | 3.56      | 15348.09 | -1.04   | 0.2984  | ns   | 0.23 | 0.27 |
|                                         | CE                                                                       | (Intercept)          | -41.73   | 29.59     | 3.42     | -1.41   | 0.2427  | .    | 0.10 | 0.12 |
|                                         | CE                                                                       | evenness             | 62.43    | 35.58     | 9261.67  | 1.75    | 0.0794  | .    | 0.10 | 0.12 |
|                                         | CE                                                                       | N addition           | 87.61    | 13.08     | 15349.48 | 6.70    | 0.0000  | ***  | 0.10 | 0.12 |

|    |                      |         |       |          |        |        |     |      |      |
|----|----------------------|---------|-------|----------|--------|--------|-----|------|------|
| CE | log(Year)            | 134.15  | 4.20  | 15349.81 | 31.94  | <2e-16 | *** | 0.10 | 0.12 |
| CE | N addition:log(Year) | -89.16  | 5.57  | 15348.26 | -16.01 | <2e-16 | *** | 0.10 | 0.12 |
| SE | (Intercept)          | 331.75  | 43.28 | 2.53     | 7.67   | 0.0082 | **  | 0.08 | 0.13 |
| SE | evenness             | -931.51 | 37.13 | 13585.24 | -25.09 | <2e-16 | *** | 0.08 | 0.13 |
| SE | N addition           | -136.54 | 13.61 | 15348.76 | -10.03 | <2e-16 | *** | 0.08 | 0.13 |
| SE | log(Year)            | -75.16  | 4.37  | 15349.00 | -17.19 | <2e-16 | *** | 0.08 | 0.13 |
| SE | N addition:log(Year) | 93.56   | 5.80  | 15348.08 | 16.14  | <2e-16 | *** | 0.08 | 0.13 |

---

## Supplementary References

1. Isbell, F. *et al.* Nutrient enrichment, biodiversity loss, and consequent declines in ecosystem productivity. *Proc. Natl. Acad. Sci. U. S. A.* **110**, 11911–11916 (2013).
2. Reich, P. B. *et al.* Plant diversity enhances ecosystem responses to elevated CO<sub>2</sub> and nitrogen deposition. *Nature* **410**, 809–812 (2001).
3. Lanta, V. & Lepš, J. Effects of species and functional group richness on production in two fertility environments: an experiment with communities of perennial plants. *Acta Oecologica* **32**, 93–103 (2007).
4. Mason, N. W. H. *et al.* Resource-use efficiency drives overyielding via enhanced complementarity. *Oecologia* **193**, 995–1010 (2020).
5. Pichon, N. A. *et al.* Decomposition disentangled: A test of the multiple mechanisms by which nitrogen enrichment alters litter decomposition. *Functional Ecology* **34**, 1485–1496 (2020).
6. Pontes, L. da S., Maire, V., Louault, F., Soussana, J. F. & Carrère, P. Impacts of species interactions on grass community productivity under contrasting management regimes. *Oecologia* **168**, 761–771 (2012).
7. Roscher, C., Schmid, B., Kolle, O. & Schulze, E. D. Complementarity among four highly productive grassland species depends on resource availability. *Oecologia* **181**, 571–582 (2016).
8. Kirwan, L. The Agrodiversity Experiment three years of data from a multisite study in intensively managed grasslands. *Ecology* **95**, 2680 (2014).
